# Supplementary material for: Inflammatory cytokines and a diverse cervicovaginal microbiota associate with cervical dysplasia in a cohort of Hispanics living in Puerto Rico
Source: PubMed Central journal article supplement (PMC10707696; doi:10.1371/journal.pone.0284673), 2023-12-08
Supplement: pone.0284673.s001.pdf [file pone.0284673.s001.pdf]

Low Cytokine Levels

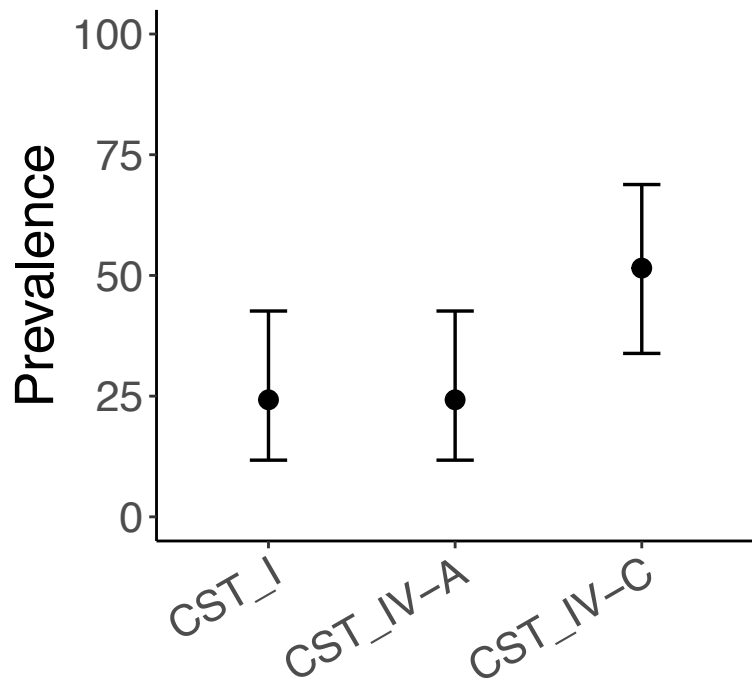

High Cytokine Levels

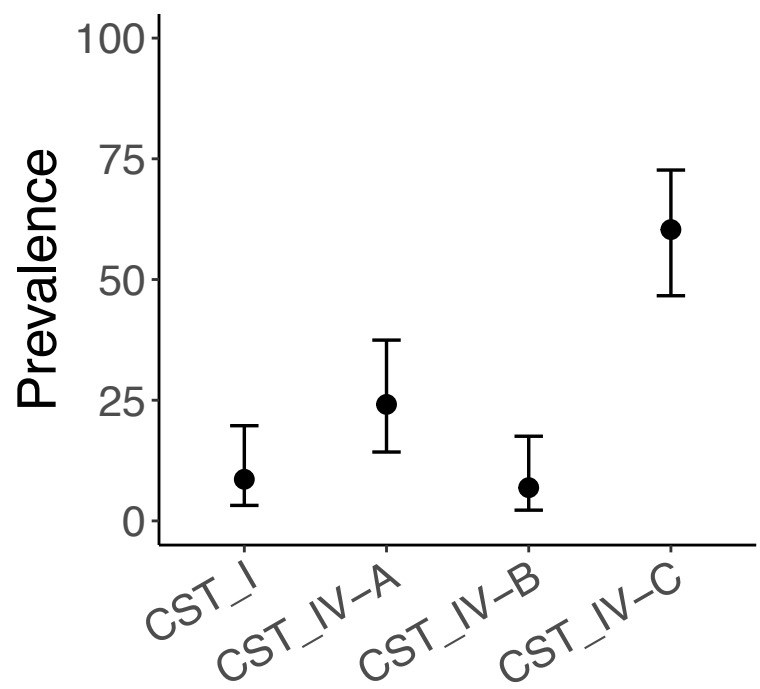

Pro Inflammatory

Low Cytokine Levels

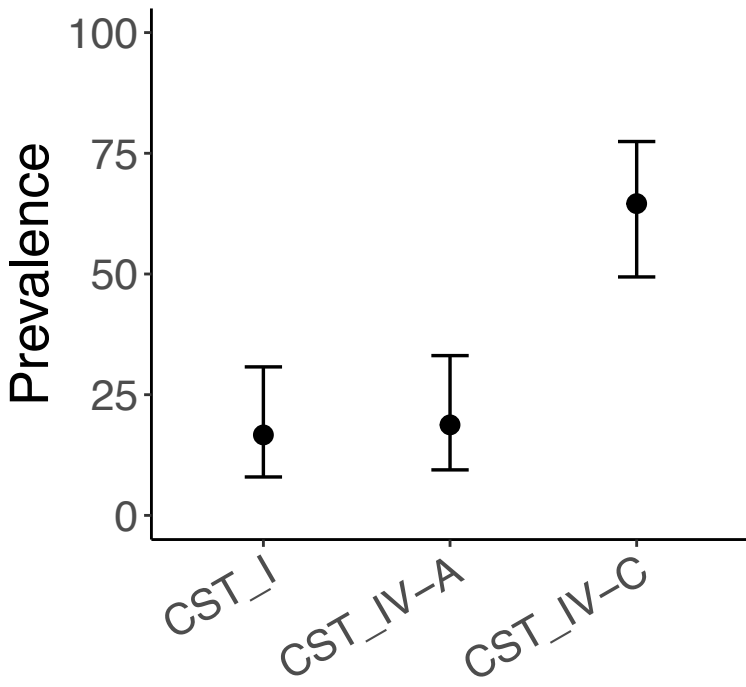

High Cytokine Levels

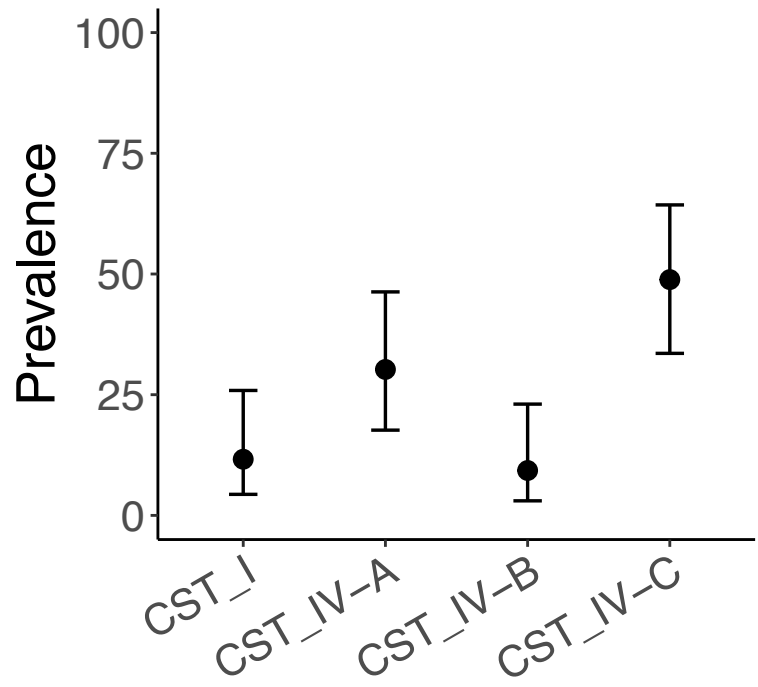

Anti Inflammatory

Low Cytokine Levels

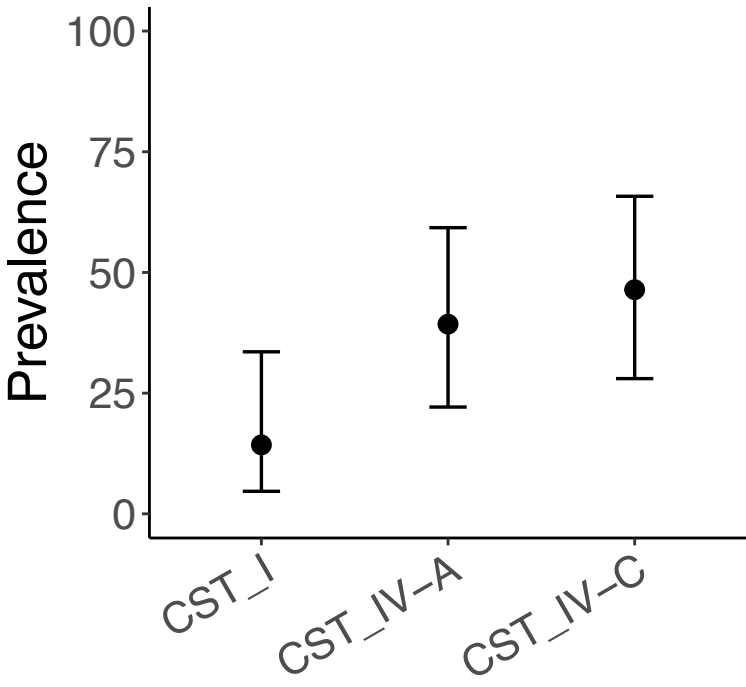

High Cytokine Levels

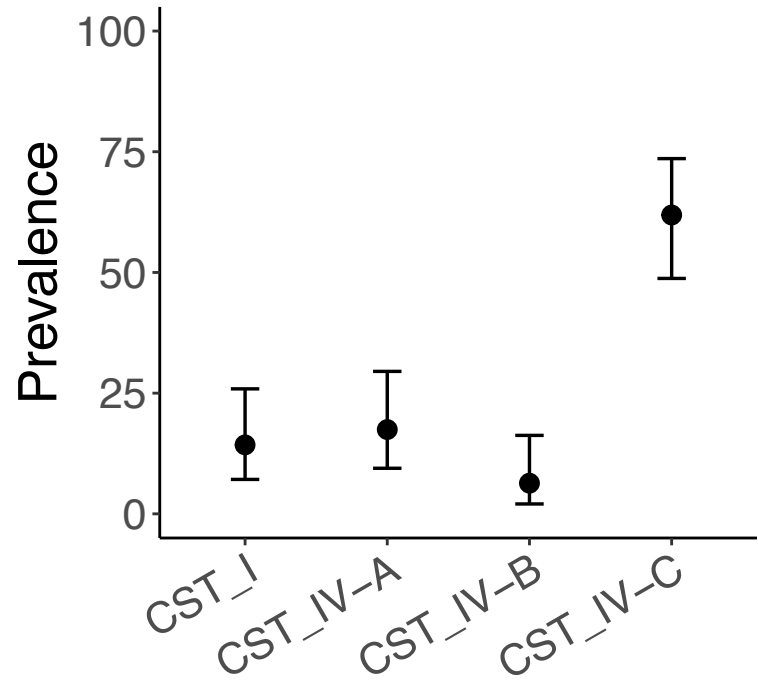

Traffic
