# Supplementary material for: Inflammatory cytokines and a diverse cervicovaginal microbiota associate with cervical dysplasia in a cohort of Hispanics living in Puerto Rico
Source: PubMed Central journal article supplement (PMC10707696; doi:10.1371/journal.pone.0284673), 2023-12-08
Supplement: pone.0284673.s002.pdf [file pone.0284673.s002.pdf]

**IL-1 $\beta$** 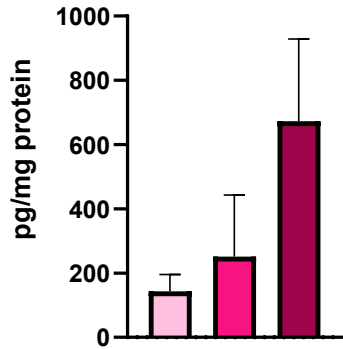**IL-6**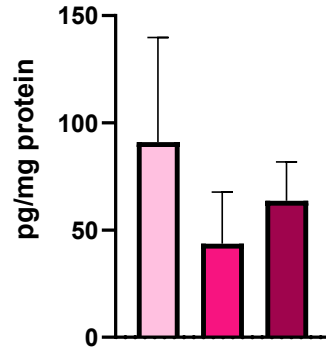**INF- $\gamma$** 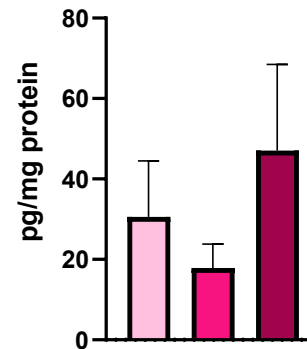**TNF- $\alpha$** 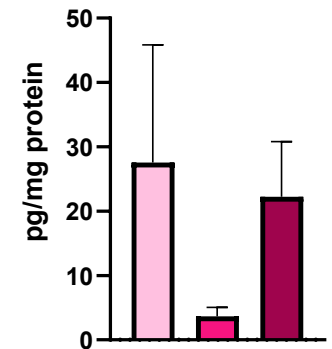**IL-8**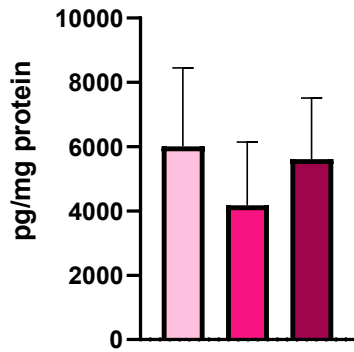**MCP1**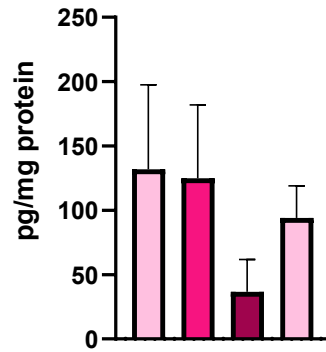**MIP1a**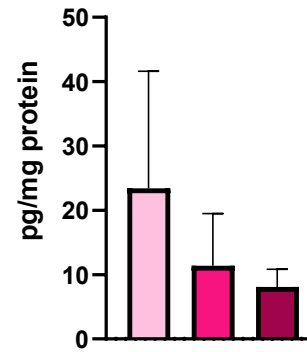**IP10**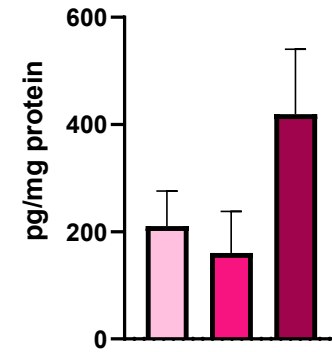**IL-4**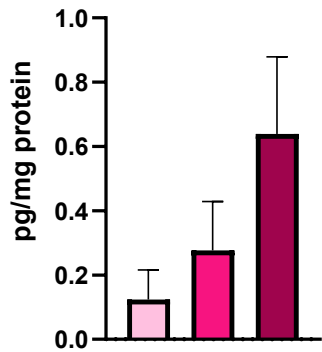**IL-10**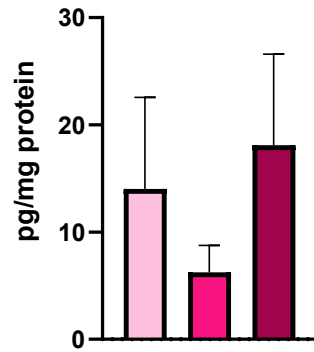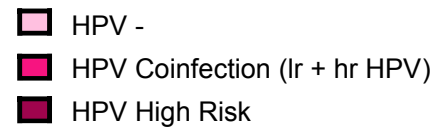

Pro Inflammatory

Traffic

Anti Inflammatory
