# Supplementary material for: Inflammatory cytokines and a diverse cervicovaginal microbiota associate with cervical dysplasia in a cohort of Hispanics living in Puerto Rico
Source: PubMed Central journal article supplement (PMC10707696; doi:10.1371/journal.pone.0284673), 2023-12-08
Supplement: pone.0284673.s003.pdf [file pone.0284673.s003.pdf]

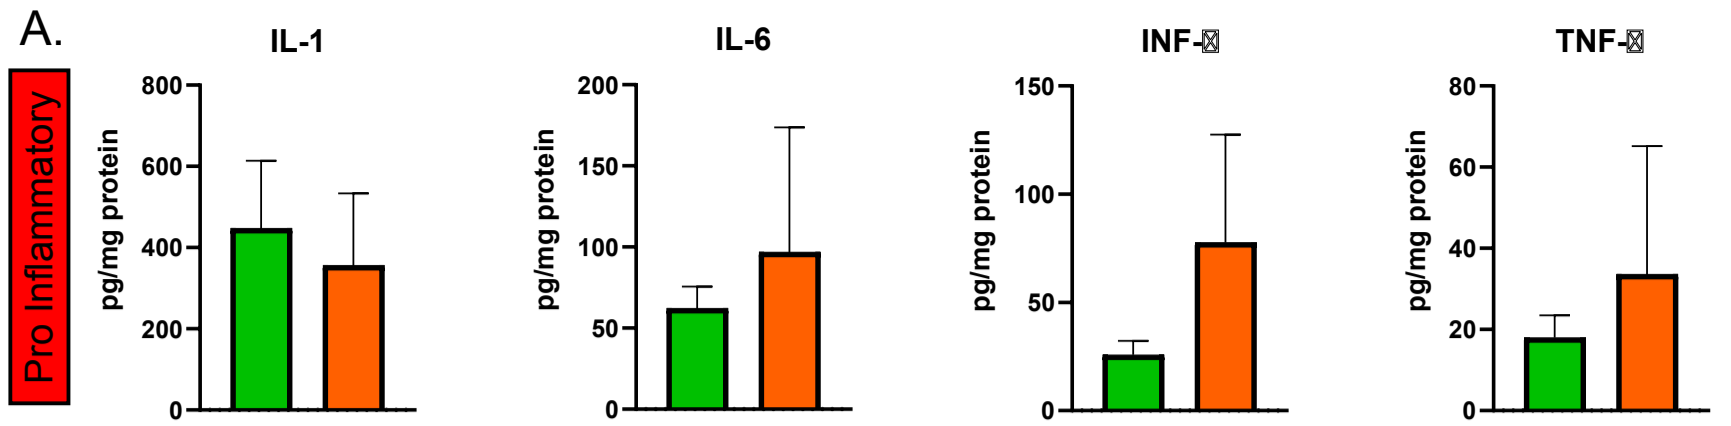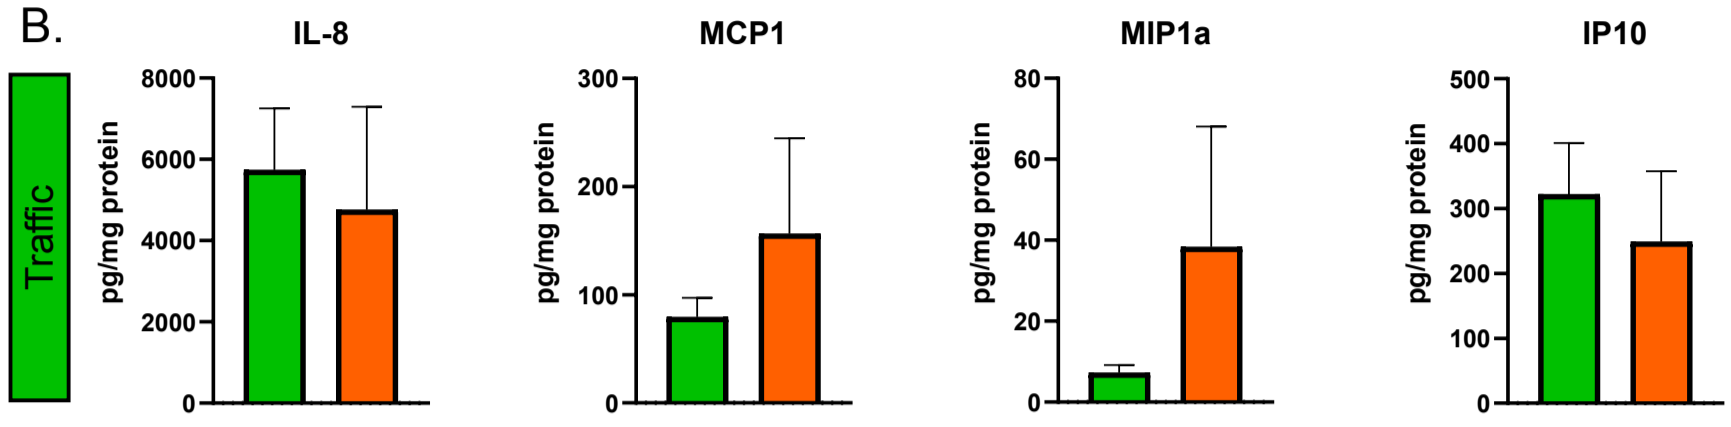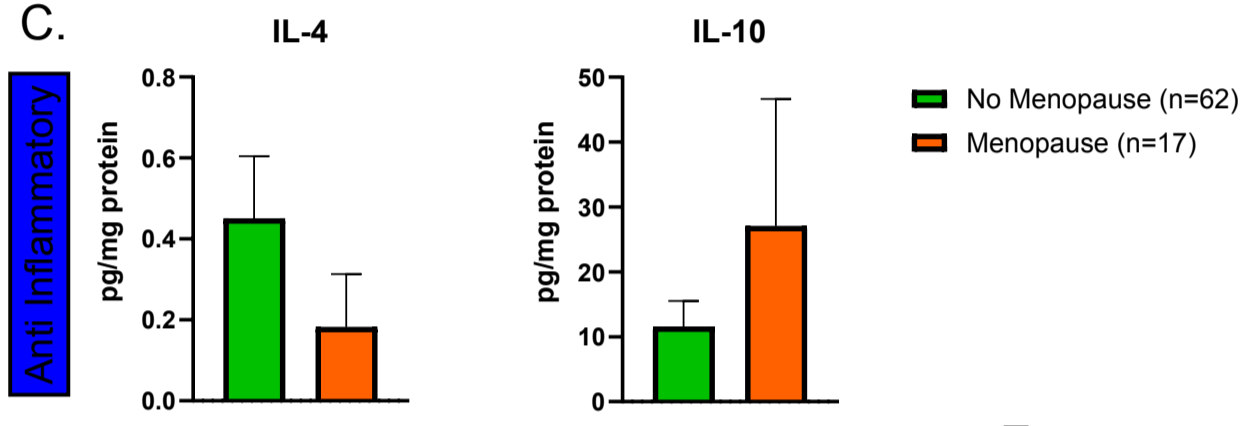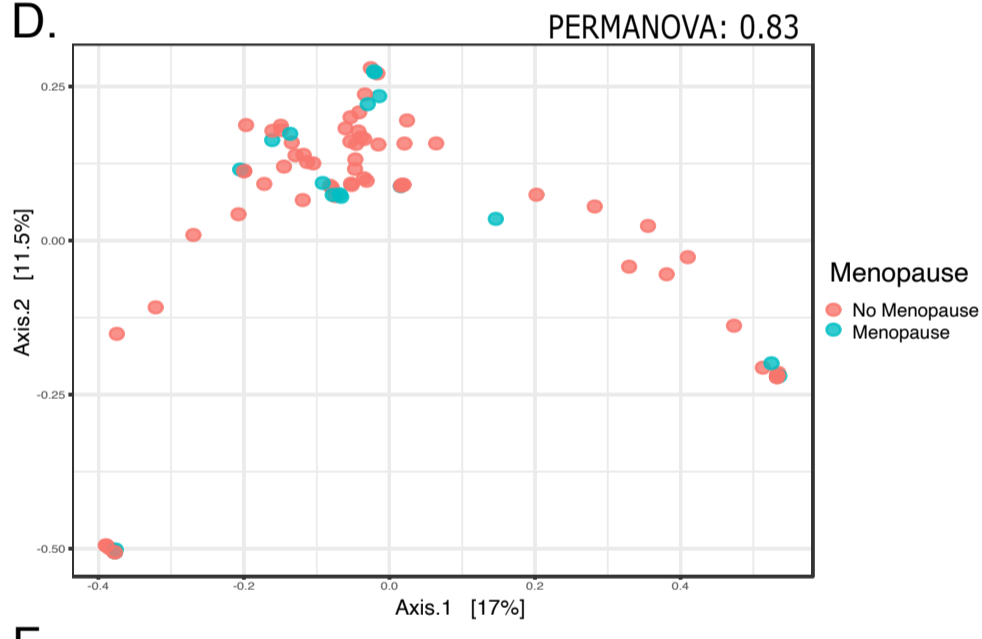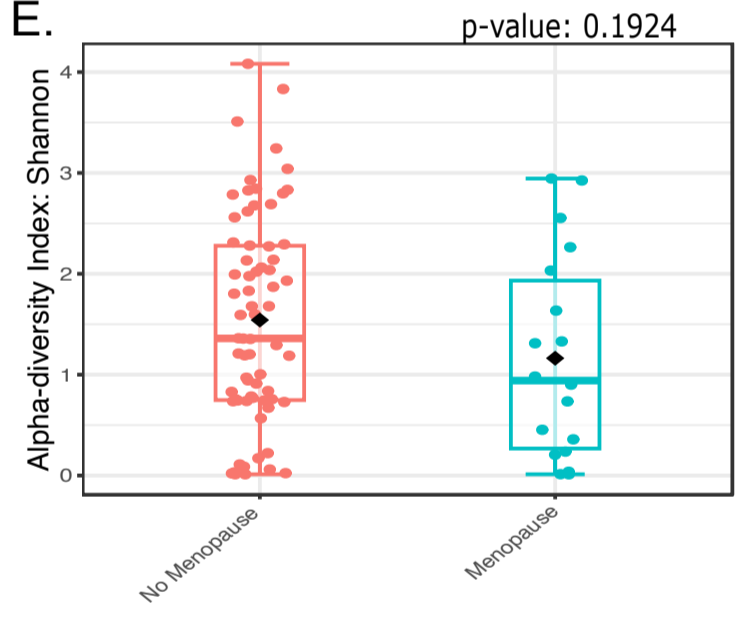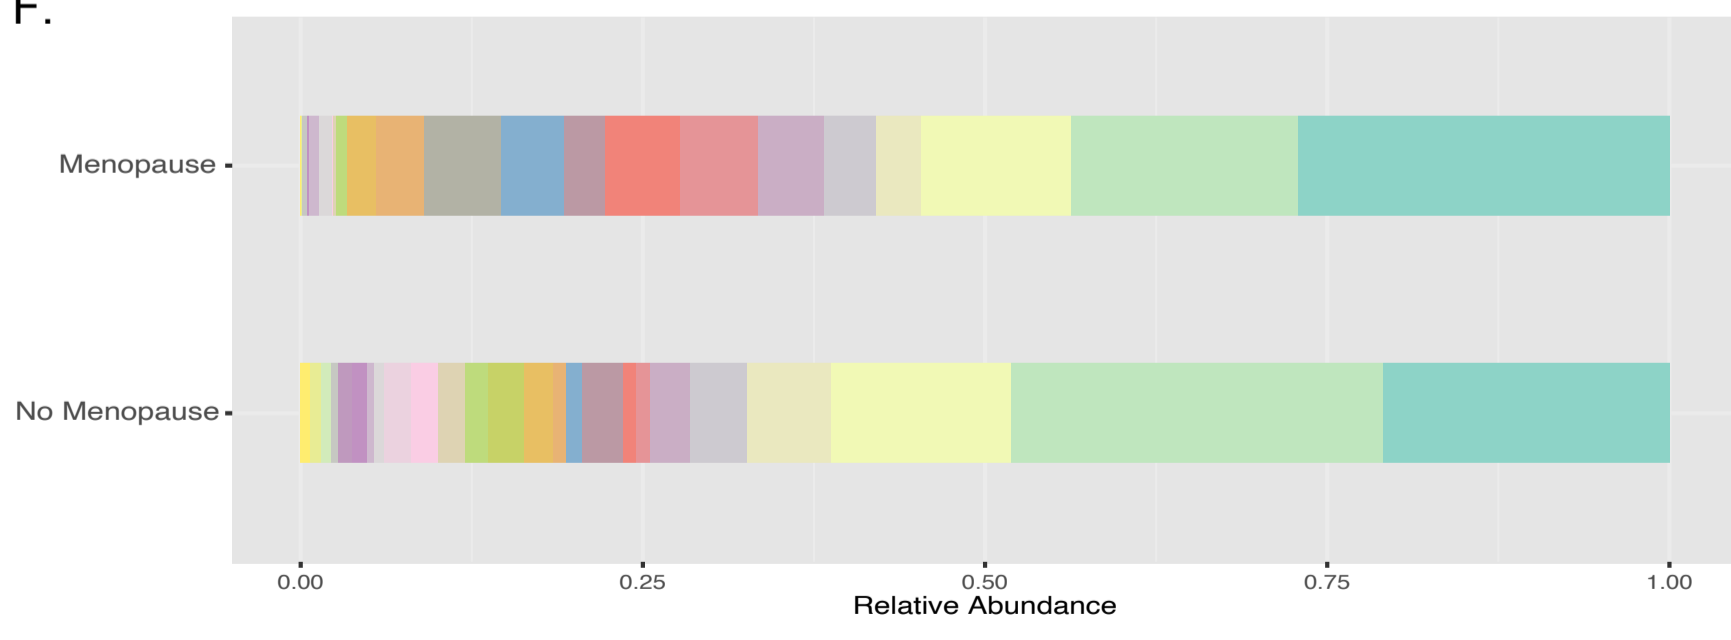

- Species**
- |                                                                  |                                                                                   |                                                                    |
|------------------------------------------------------------------|-----------------------------------------------------------------------------------|--------------------------------------------------------------------|
| <span style="color: teal;">■</span> Lactobacillus_crispatus      | <span style="color: blue;">■</span> Megasphaera_sp__oral_taxon_841                | <span style="color: grey;">■</span> Clostridium                    |
| <span style="color: lightgreen;">■</span> Lactobacillus_iners    | <span style="color: grey;">■</span> Escherichia_coli                              | <span style="color: purple;">■</span> Prevotella_amnii             |
| <span style="color: yellowgreen;">■</span> Gardnerella_vaginalis | <span style="color: orange;">■</span> Streptococcus_anginosus                     | <span style="color: purple;">■</span> Pseudomonas                  |
| <span style="color: yellow;">■</span> Others                     | <span style="color: orange;">■</span> Prevotella_bivia                            | <span style="color: purple;">■</span> Bifidobacterium_dentium      |
| <span style="color: grey;">■</span> Atopobium_vaginae            | <span style="color: greenyellow;">■</span> Lachnospiraceae_G_9_sp__oral_taxon_924 | <span style="color: grey;">■</span> Dialister                      |
| <span style="color: purple;">■</span> Prevotella                 | <span style="color: greenyellow;">■</span> Sneathia                               | <span style="color: lightgreen;">■</span> Alloscardovia_omnicolens |
| <span style="color: red;">■</span> Lactobacillus_jensenii        | <span style="color: brown;">■</span> Prevotella_buccalis                          | <span style="color: yellowgreen;">■</span> Lactobacillus           |
| <span style="color: red;">■</span> Lactobacillus_gasseri         | <span style="color: pink;">■</span> Gardnerella                                   | <span style="color: yellow;">■</span> Veillonella_montpellierensis |
| <span style="color: purple;">■</span> NA                         | <span style="color: pink;">■</span> Aerococcus_christensenii                      |                                                                    |
