# Supplementary material for: Inflammatory cytokines and a diverse cervicovaginal microbiota associate with cervical dysplasia in a cohort of Hispanics living in Puerto Rico
Source: PubMed Central journal article supplement (PMC10707696; doi:10.1371/journal.pone.0284673), 2023-12-08

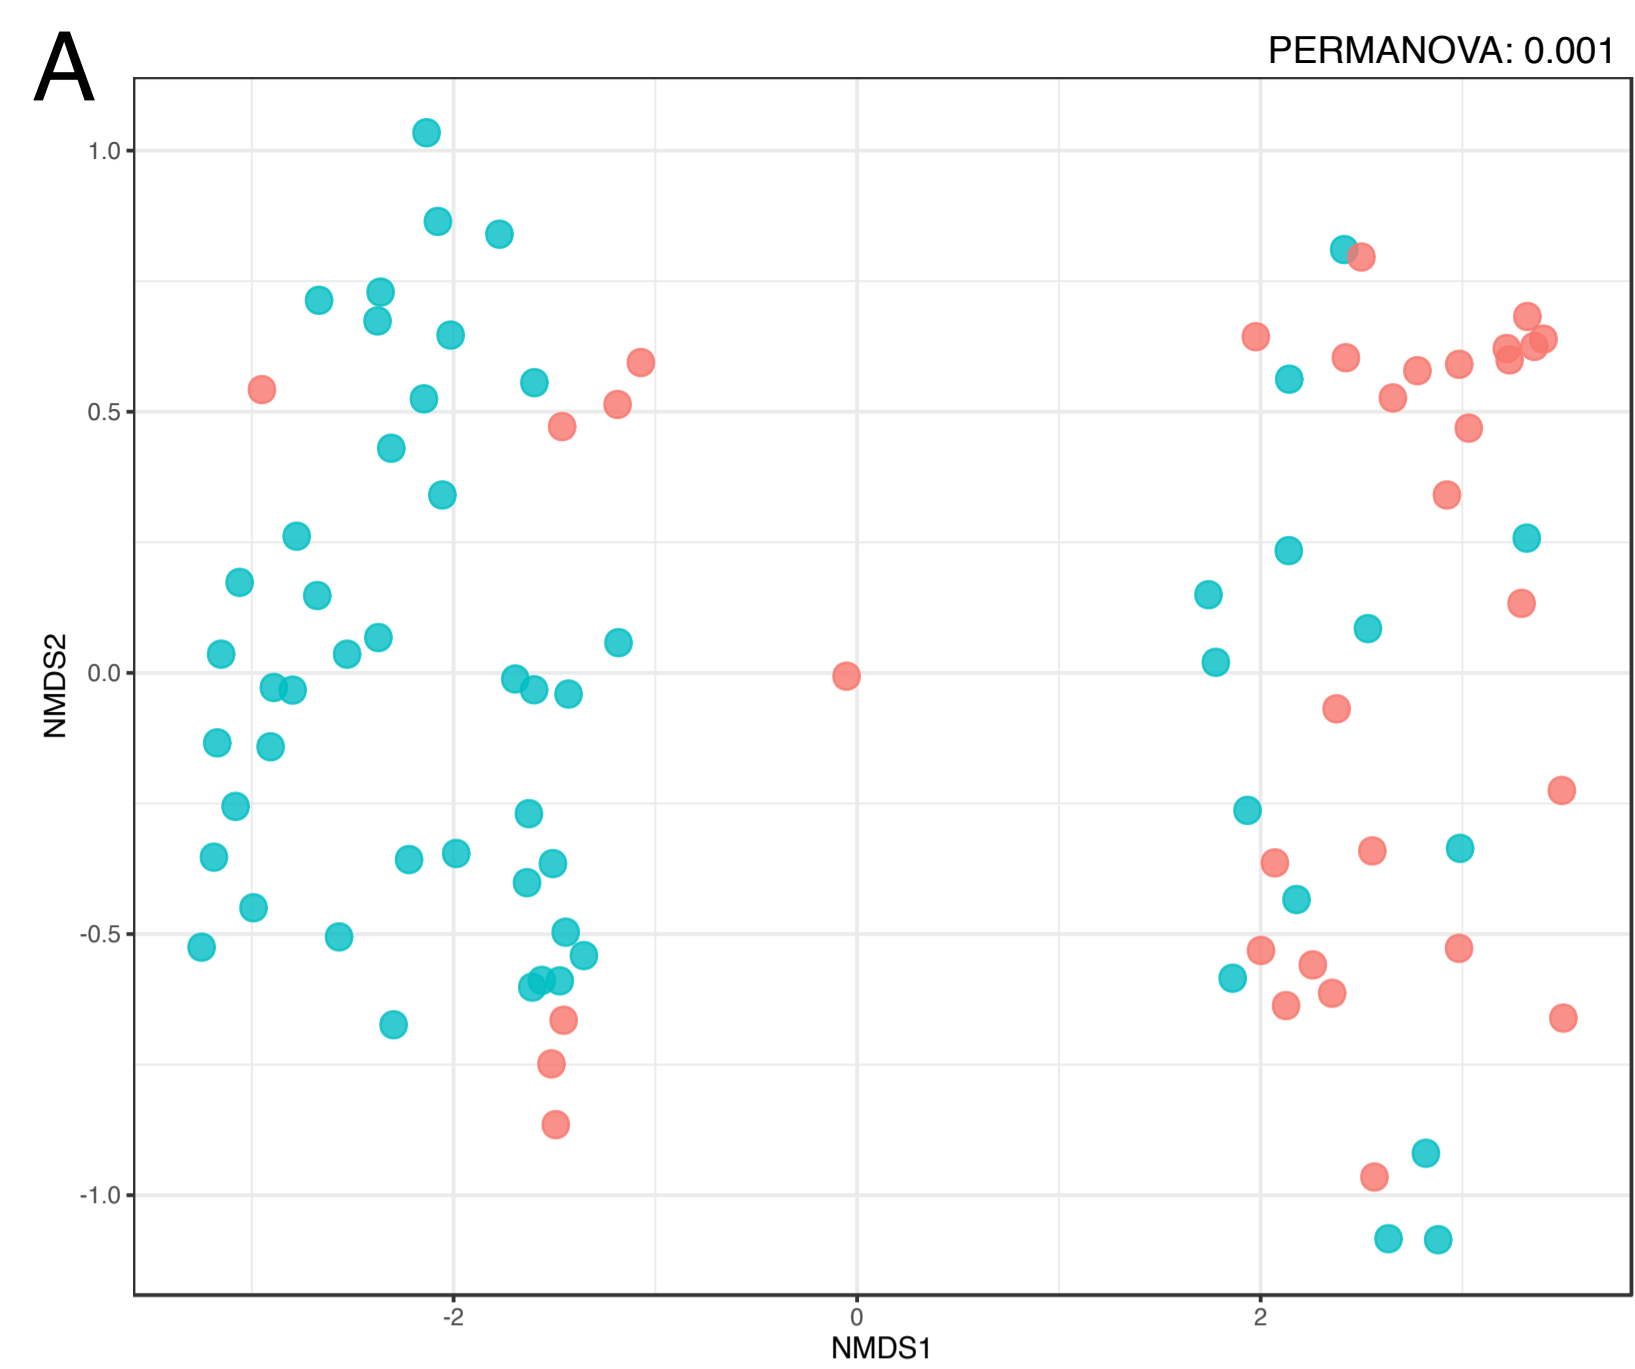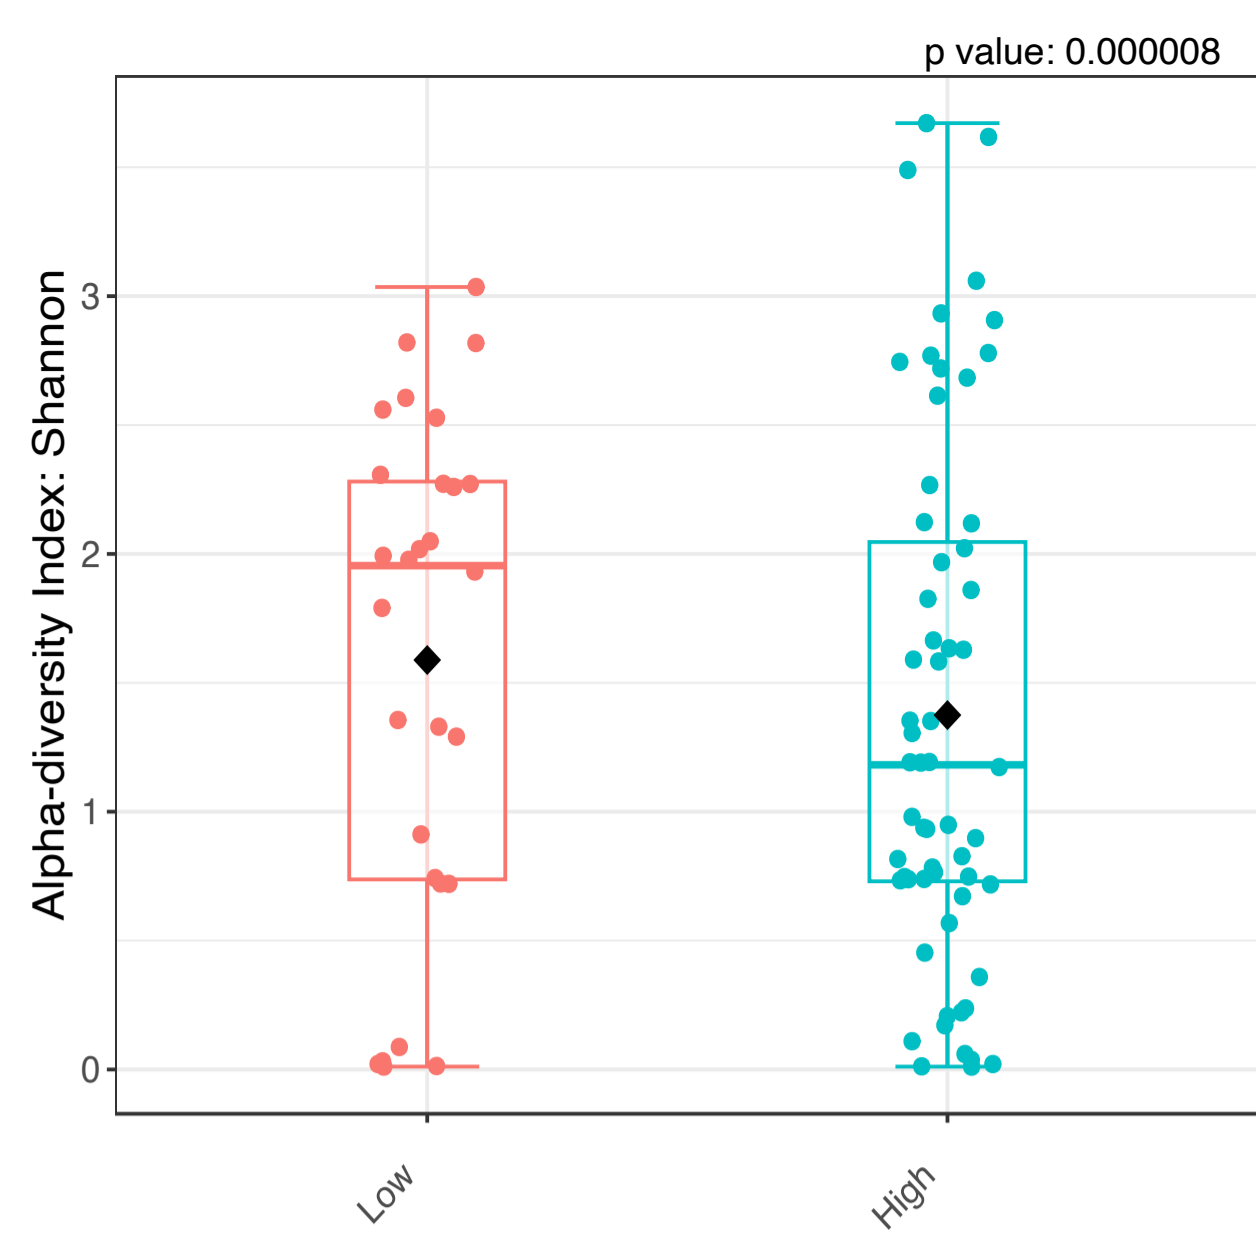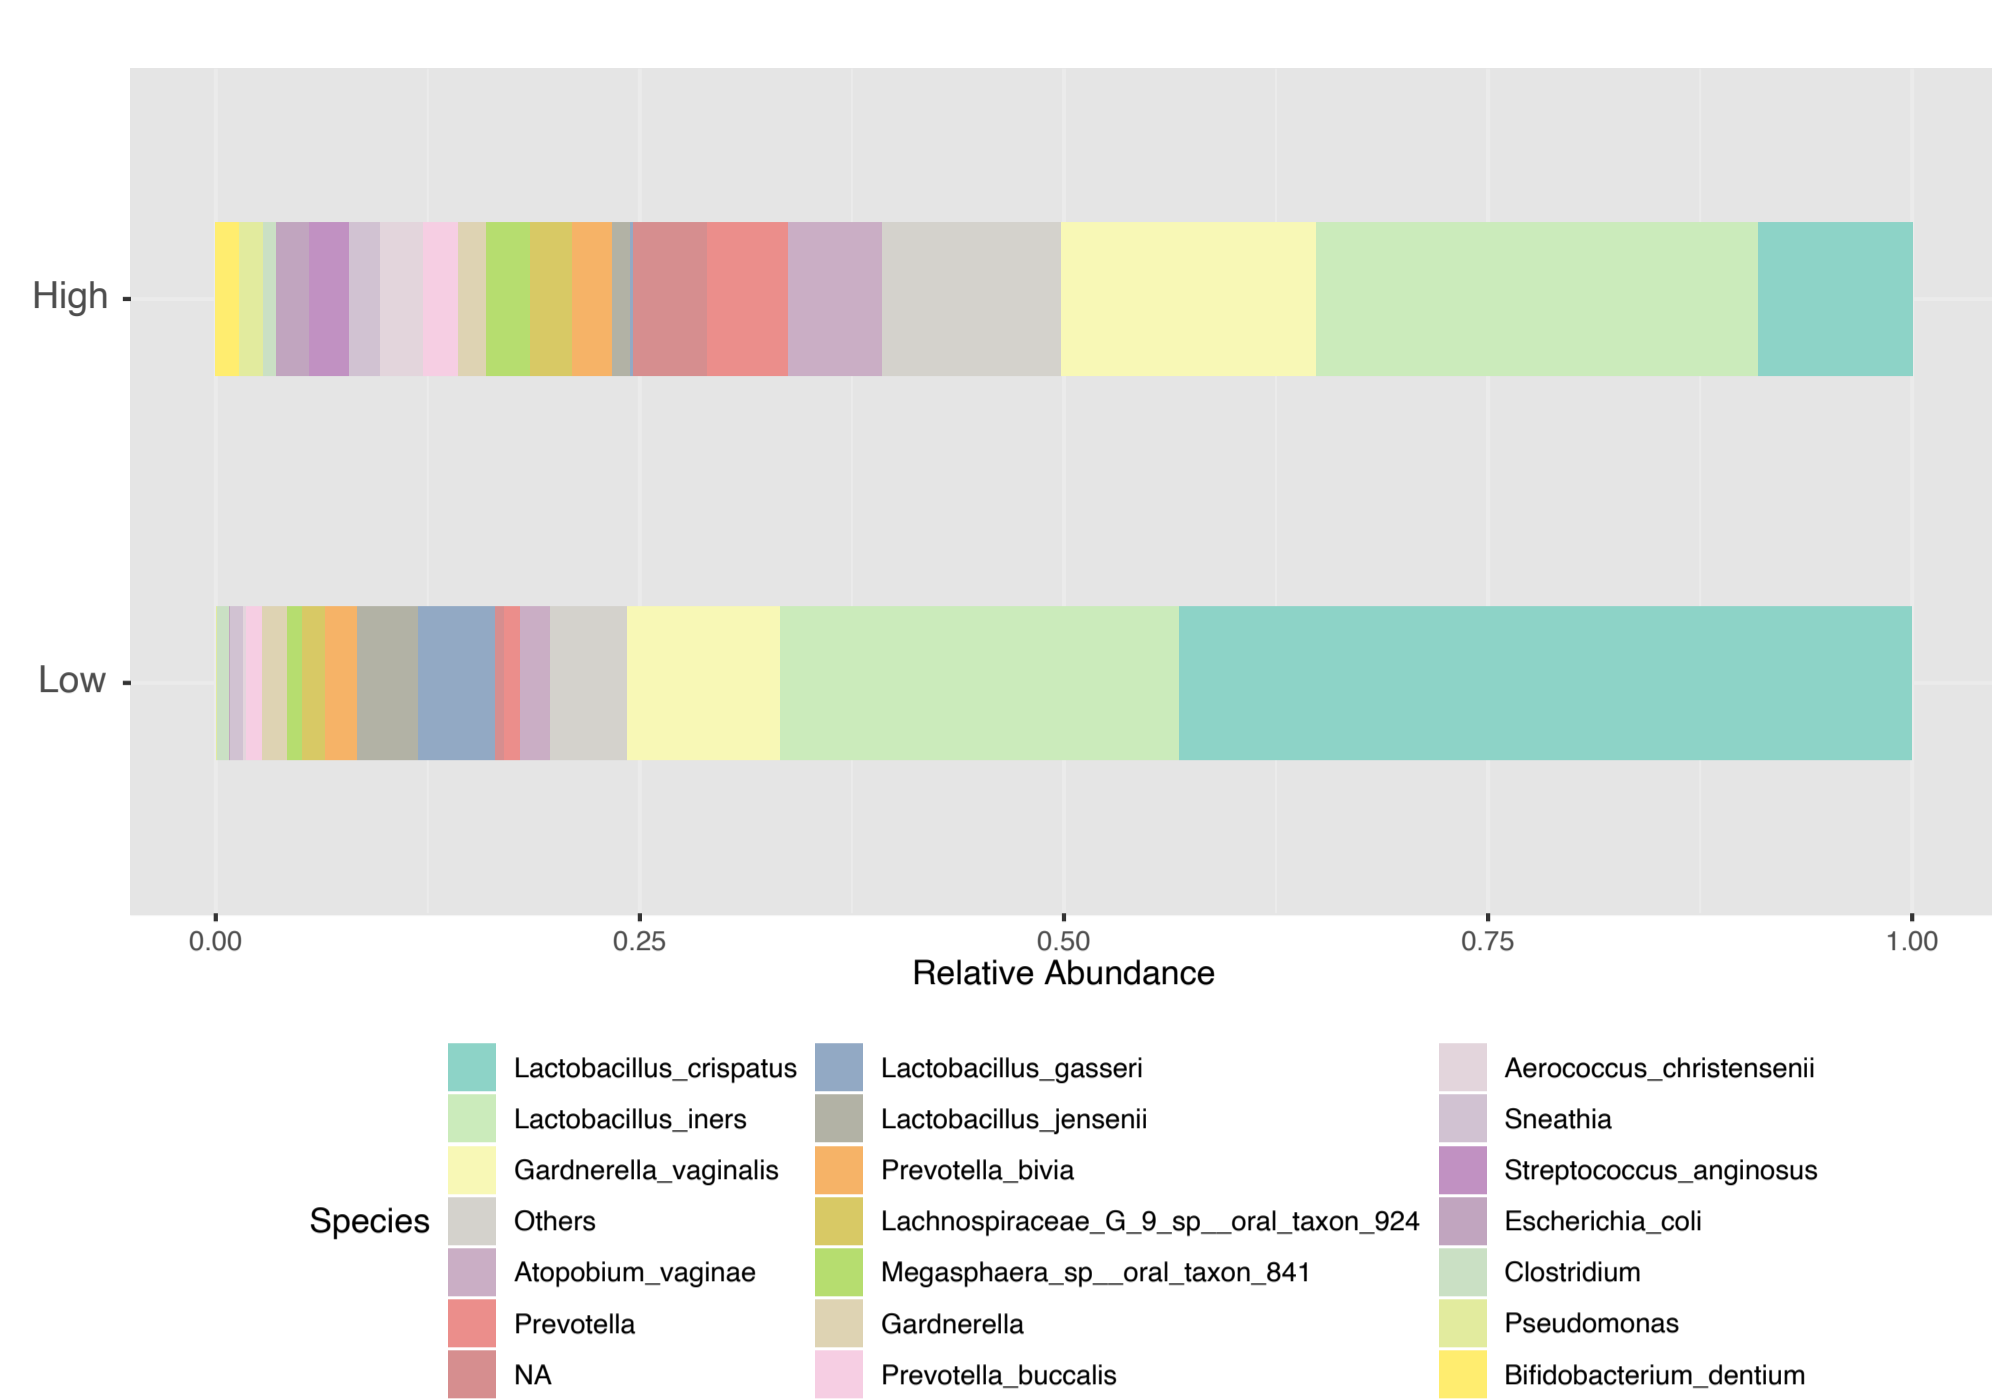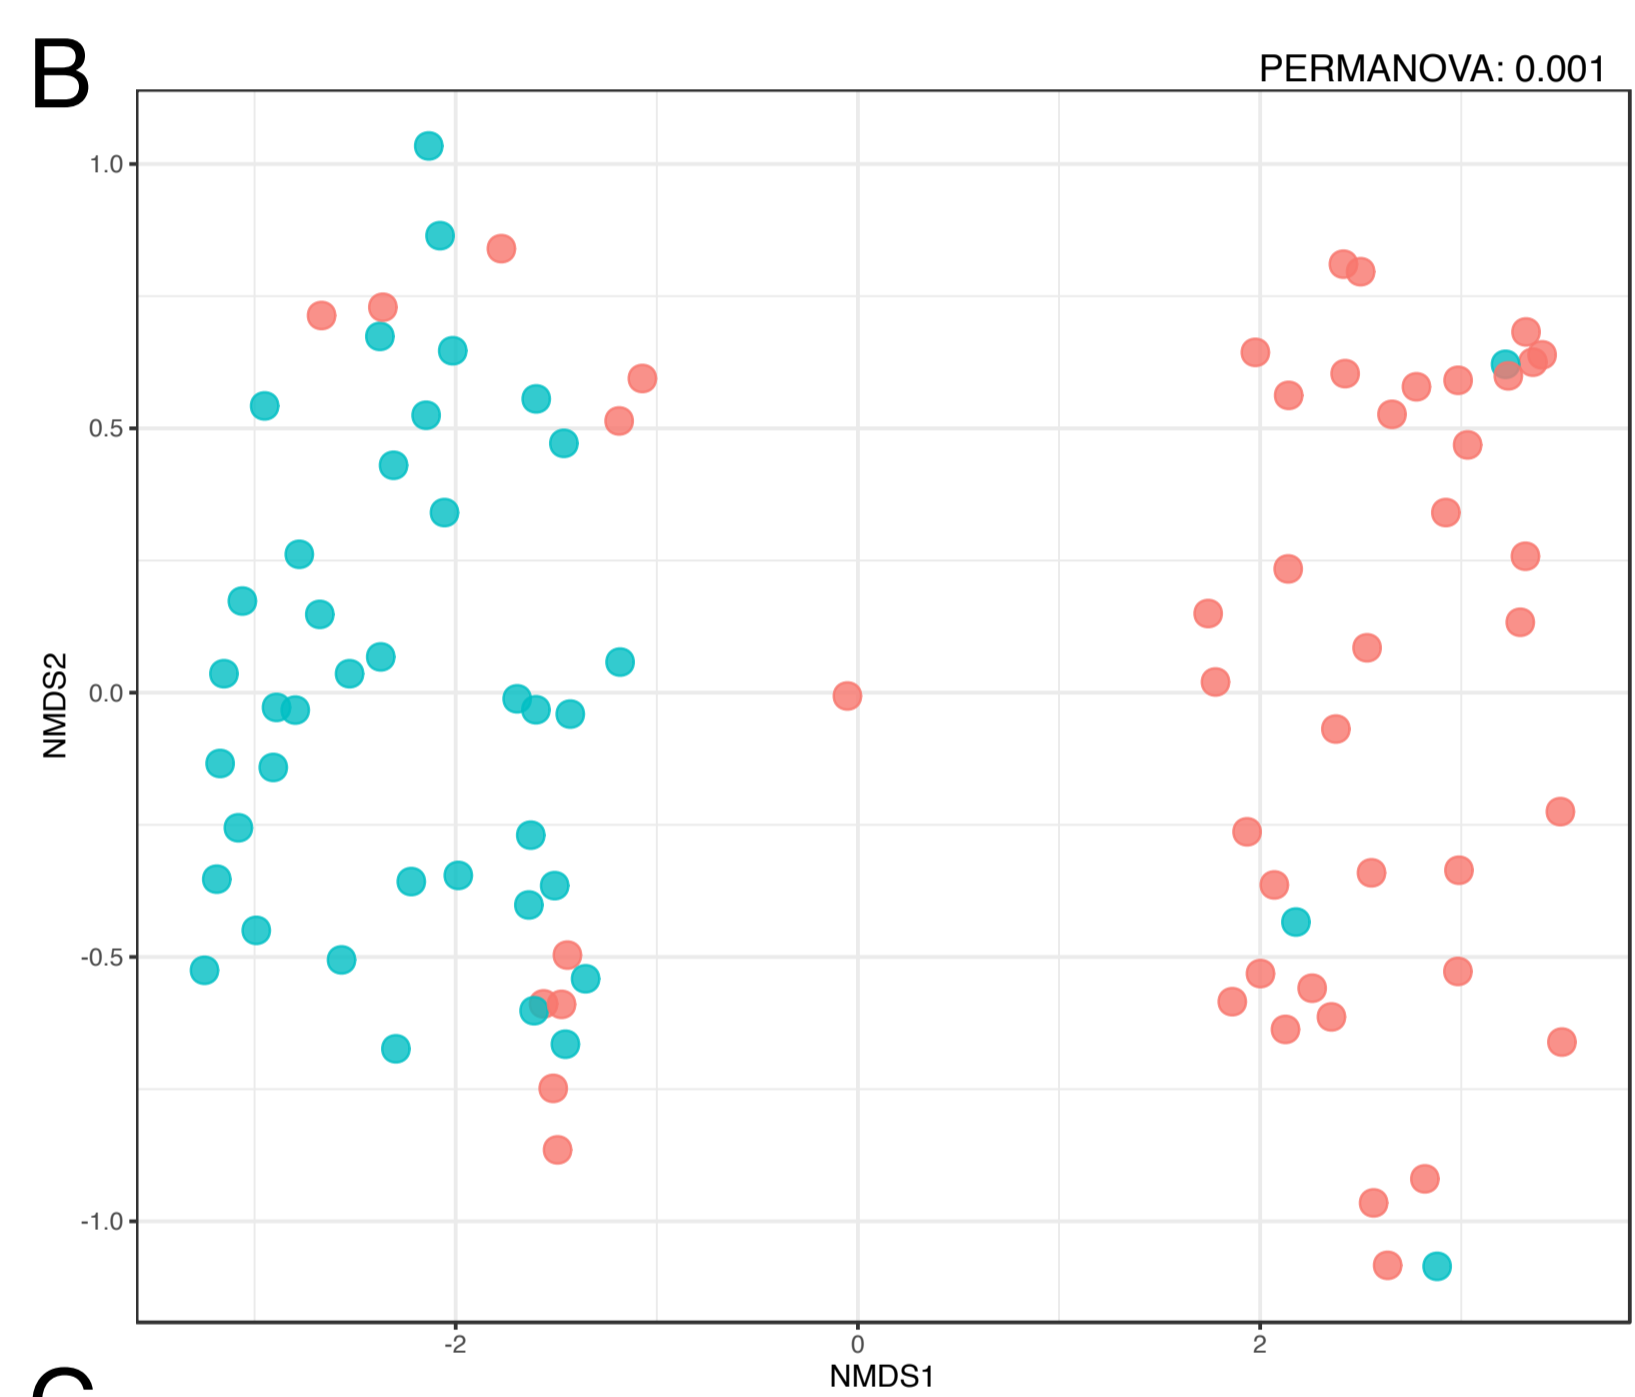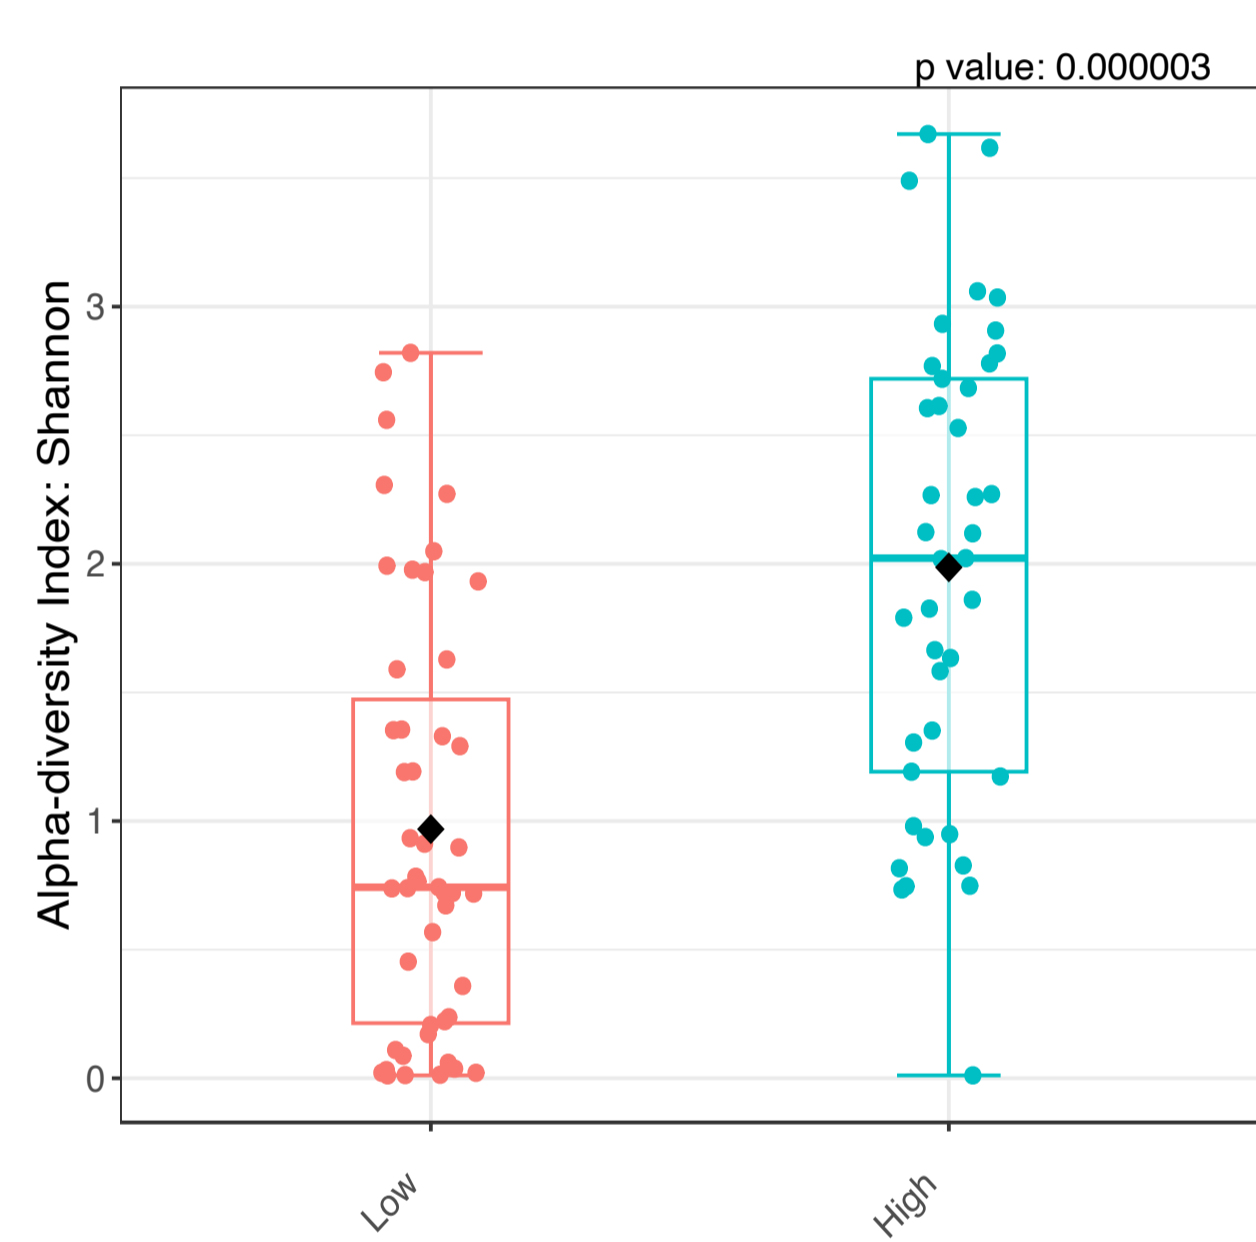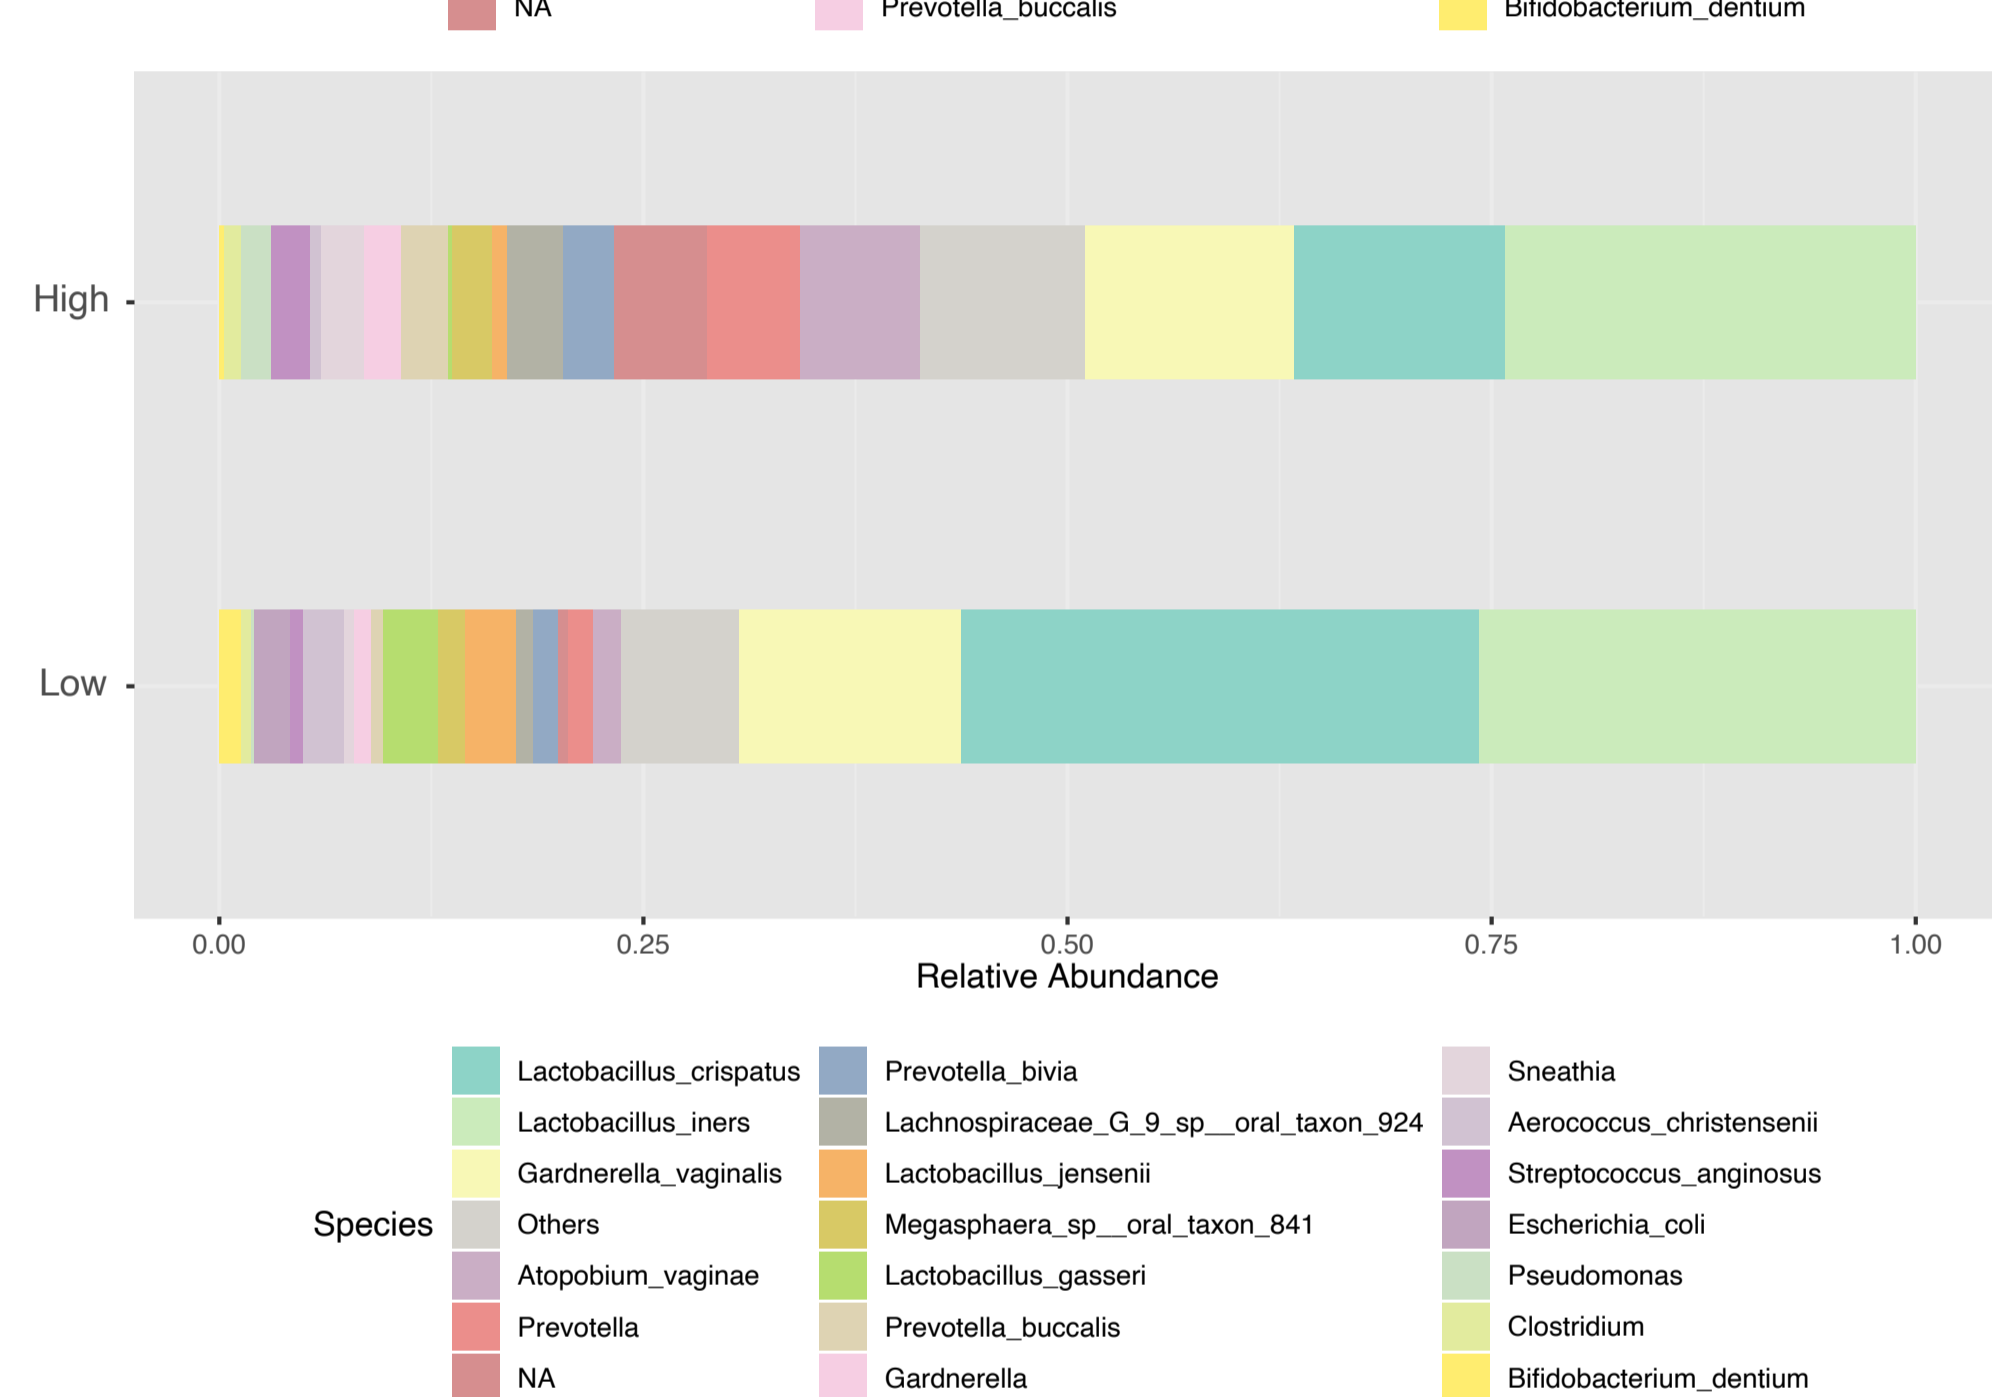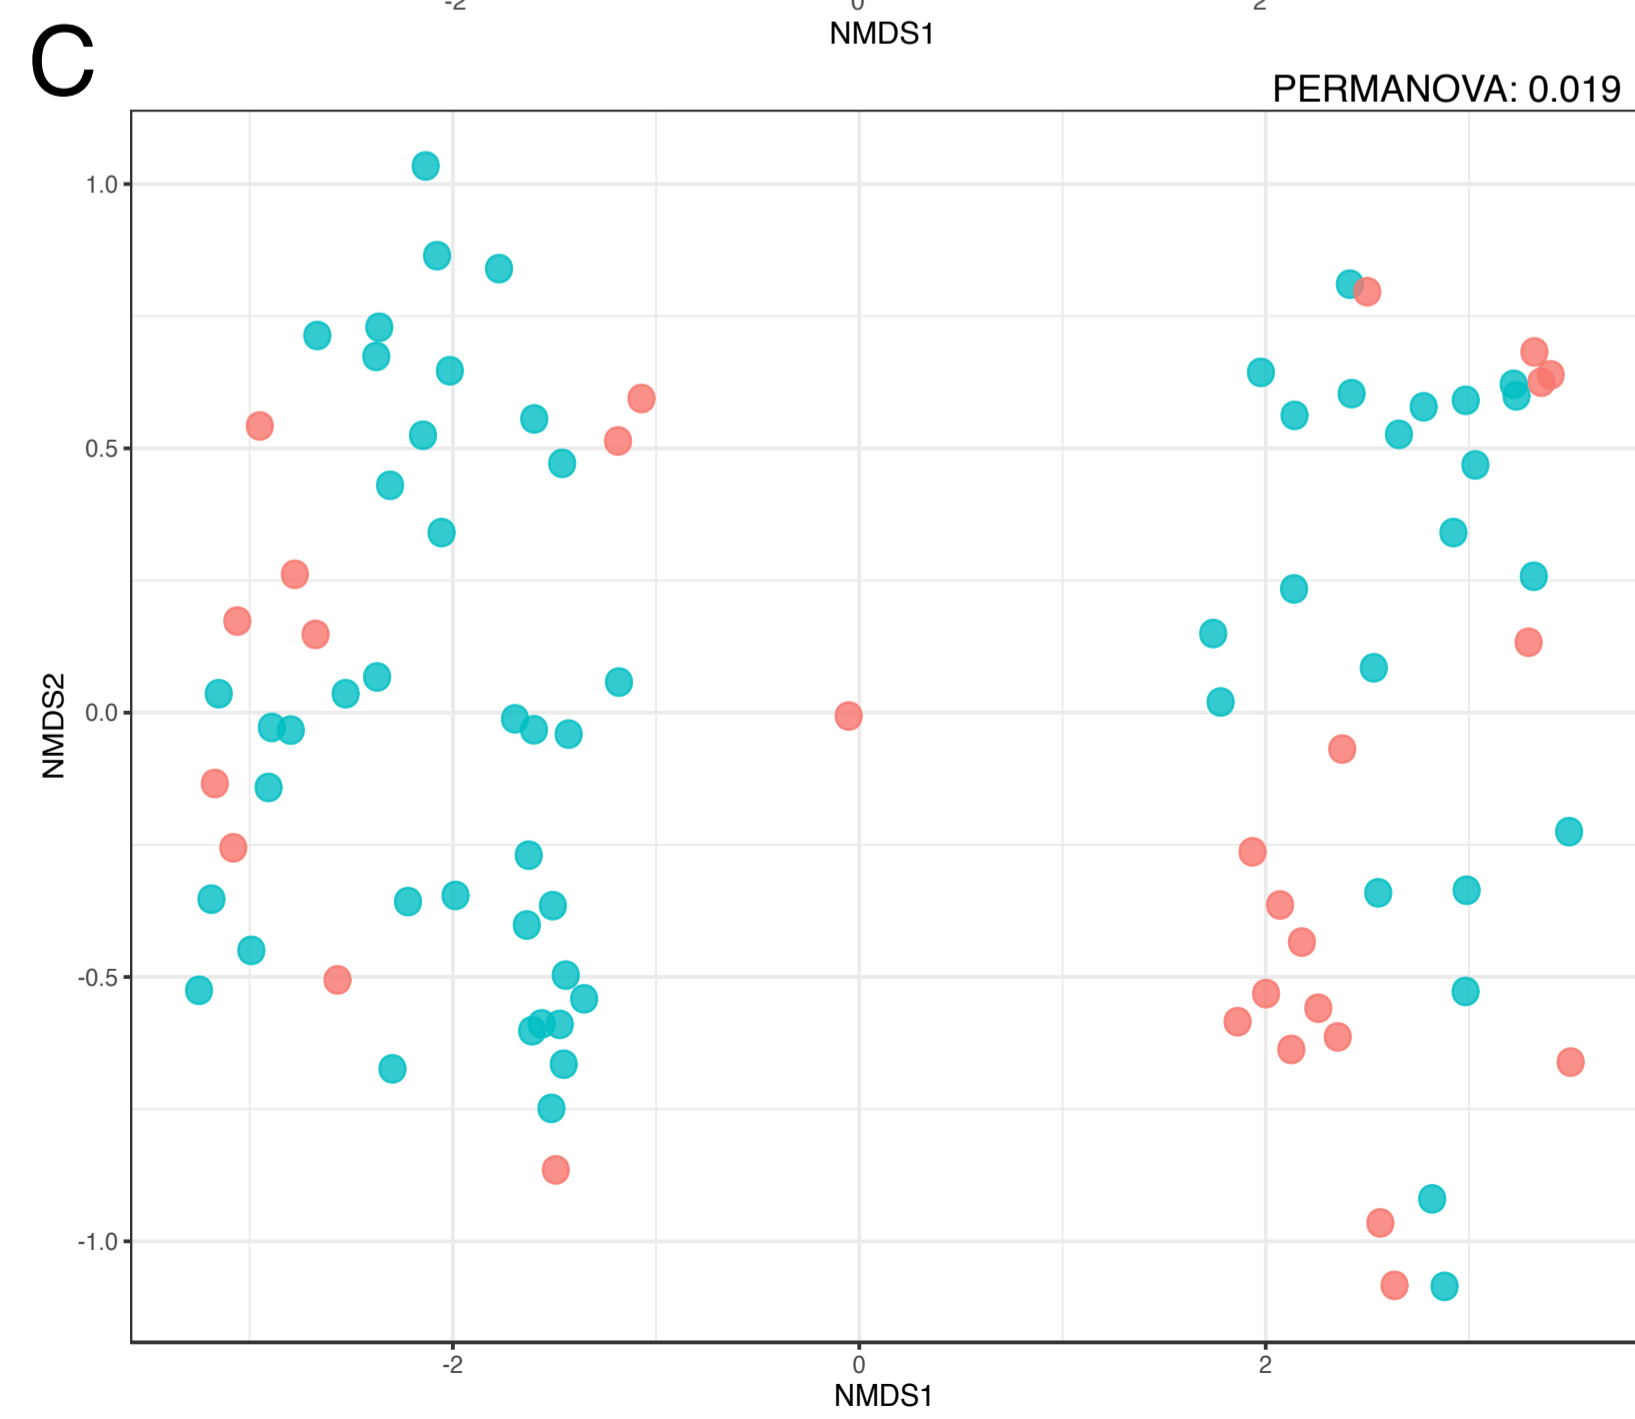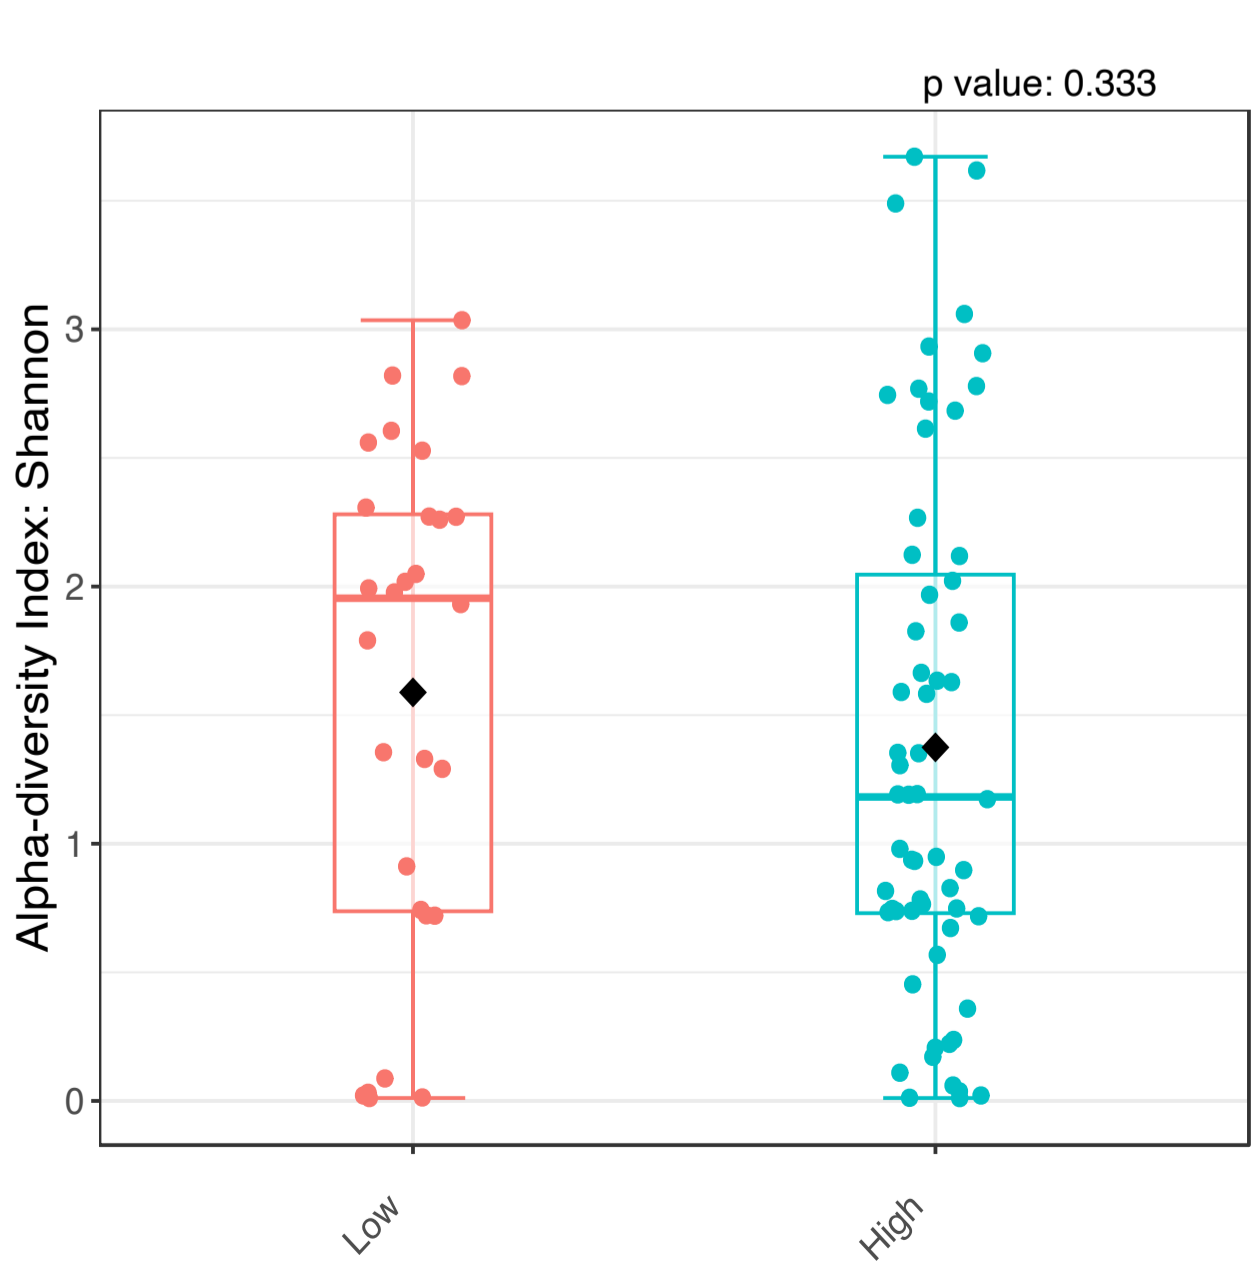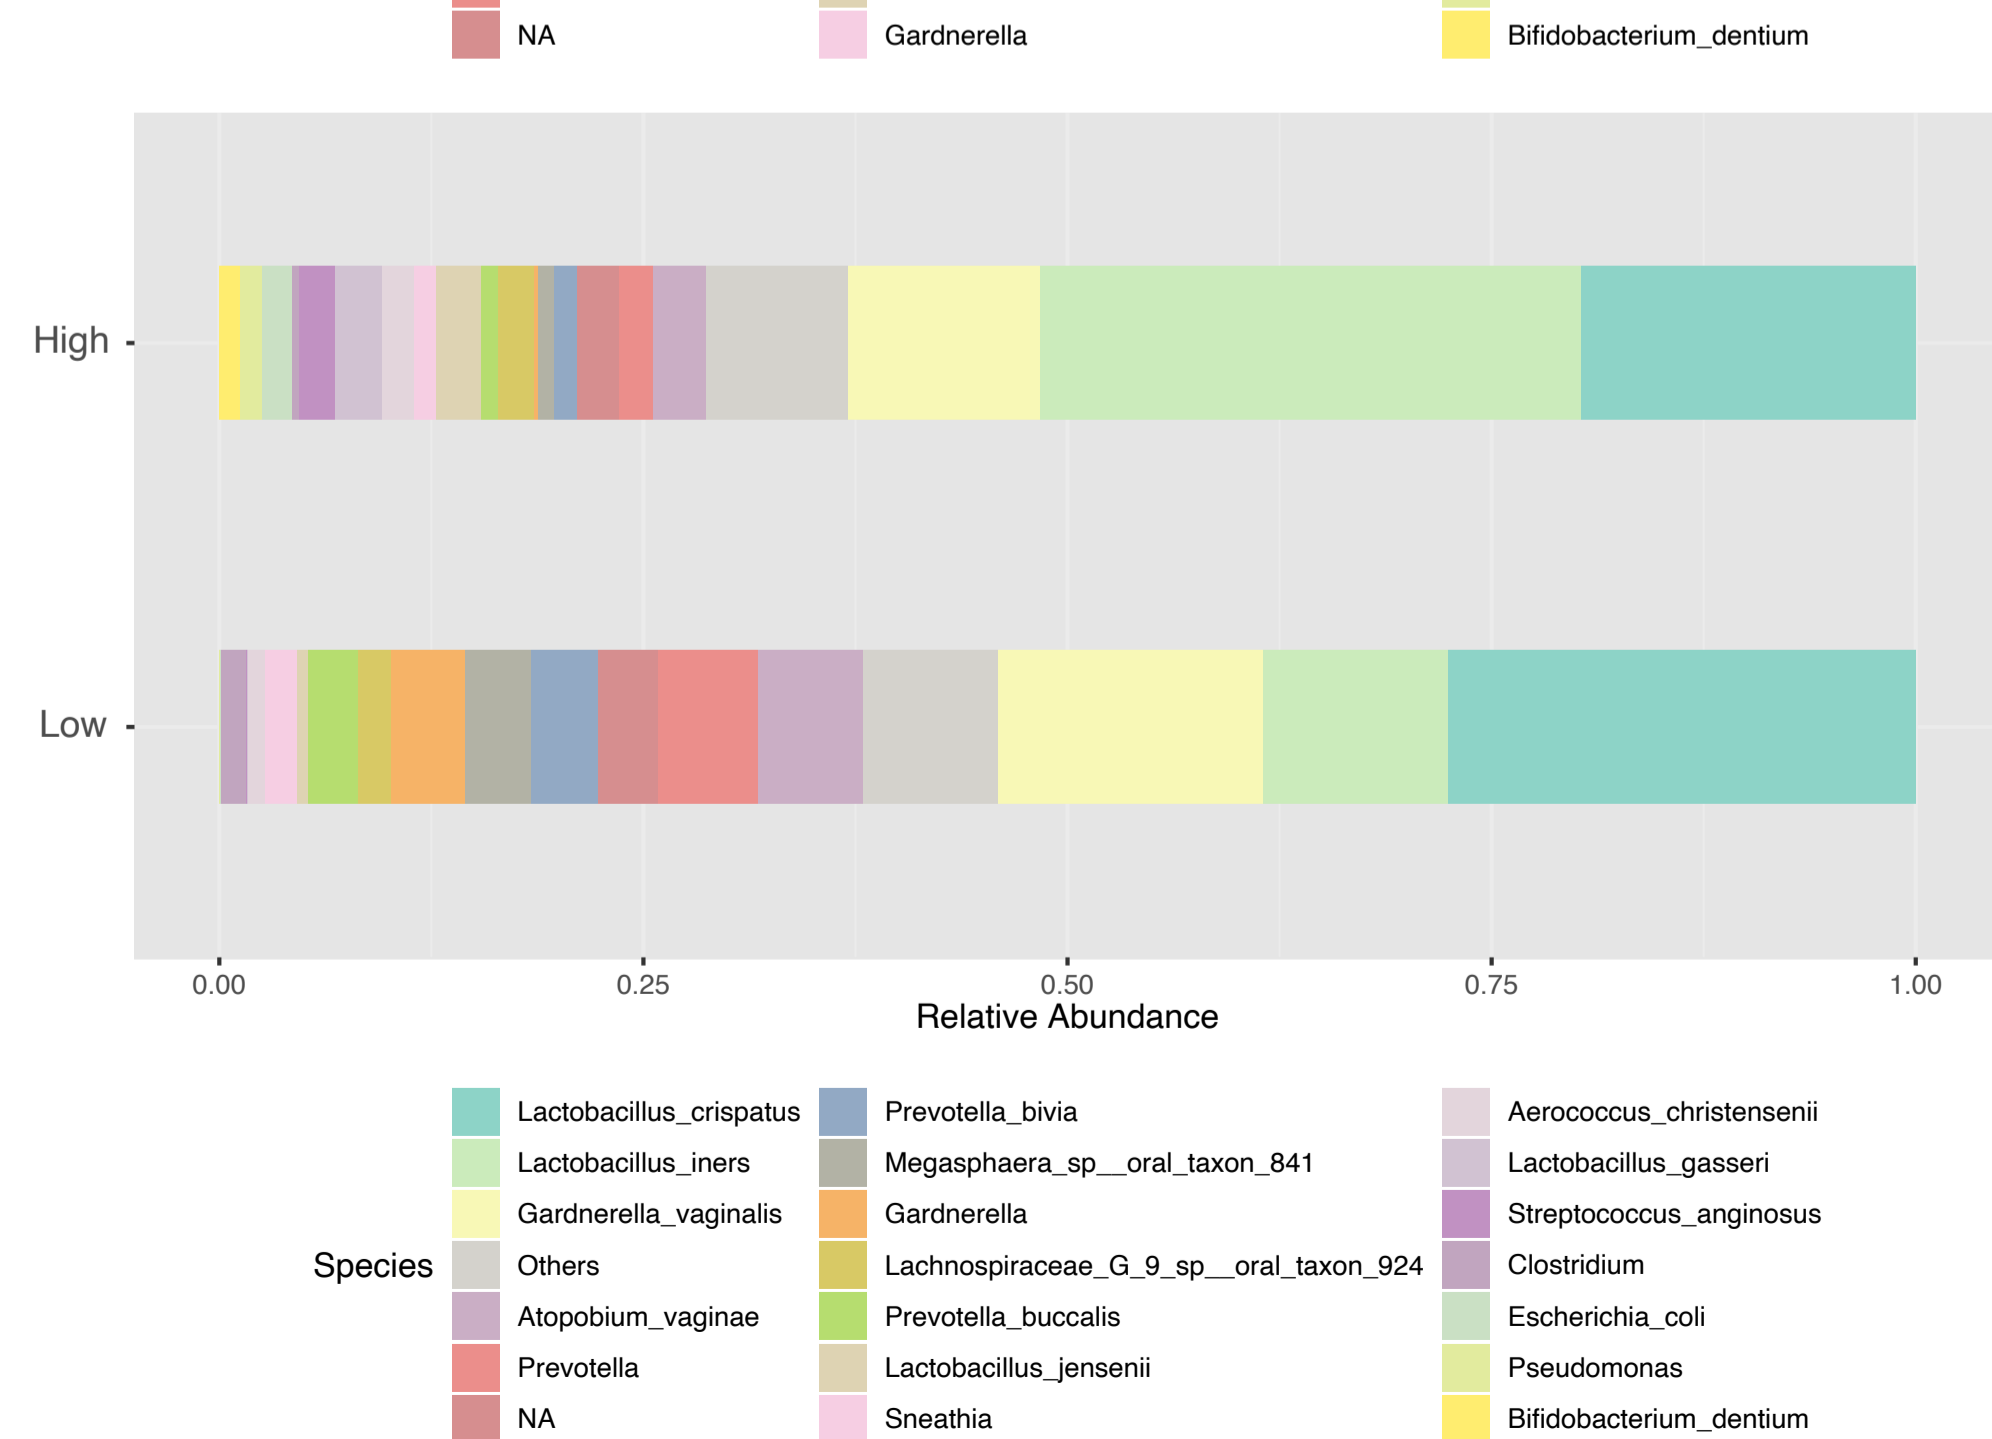

Supplement: pone.0284673.s004.pdf [file pone.0284673.s004.pdf]
